# Supplementary figures and images for: Antioxidant and Cytoprotective Properties of Plant Extract from Dry Flowers as Functional Dyes for Cosmetic Products
Source: MDPI journal article supplement (doi:10.3390/molecules26092809), 2021-05-10

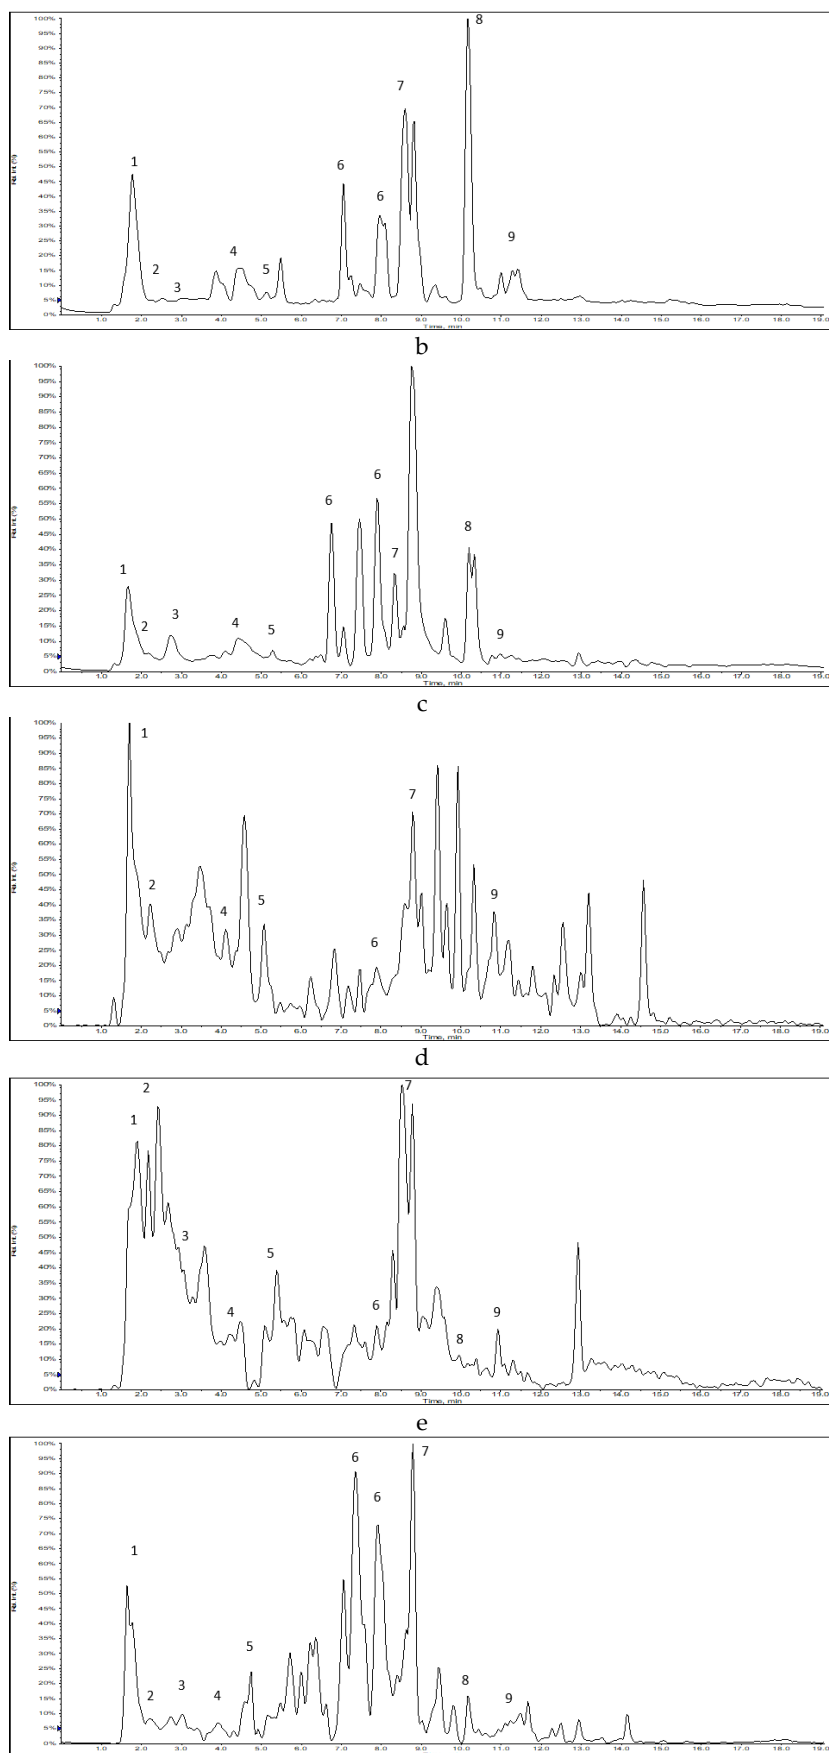

**Figure S1.** Extracted ion chromatograms (XIC) obtained for a) PRE, b) KTE, c) GGE, d) PGE and e) CTE.

Supplement: s1 [file s1]
